# Supplementary material
Source: PubMed Central journal article supplement (PMC7482317)
Supplement: ed0c00748_si_001.pdf [file ed0c00748_si_001.pdf]

### Questions for teachers

- Name (fill the gap)
- Teaching experience (number)
- Do you use experiments in your distance teaching? (yes/no)
- How do you do it? (I show some pictures of the experiment; I play a video of the experiment; I show the experiments to students by a demonstration; Students do the experiments at home; Some other way: \_\_\_\_\_)
- How often do you use data loggers? (1. I never use data loggers; 2. Rarely (I used data loggers once or twice); 3. Occasionally (I used data loggers few times); 4. Often (I used data loggers almost on every lesson); 5. Very often (I used data loggers on every lesson))
- Why did you decide to continue using data loggers in distance learning? (open question)
- How do you realize experiments with data loggers? (open question)
- With what groups of students do you use data loggers' experiments? (Experienced students in using data loggers; Non-experienced students in using data loggers)
- Give 3 pros of doing experiments this way.
- Give 3 cons of doing experiments this way.

### Questions for students:

- Nickname (fill the gap)
- Name of your teacher (fill the gap)
- Age (number)
- Do you enjoy learning chemistry in the distance way? (yes/no)
- What do you like the most about distance chemistry learning? (open question)
- What is the most difficult in distance chemistry learning? (open question)
- What do you miss the most in distance chemistry learning? (open question)
- Do you like chemical experiments in distance classes? (open question)
- Did you work with data loggers classically, before COV19? (yes/no)
